# Supplementary material
Source: ML conference proceedings conference paper supplement (https://proceedings.mlr.press/v70/wang17l.html)
Supplement: Supplementary file [file wang17l-supp.pdf]

In the following appendices, we provide detailed proofs of theorems stated in the main paper. In Section A we first prove a basic inequality which is useful throughout the rest of the convergence analysis. Section B contains general analysis of the batch primal-dual algorithm that are common for proving both Theorem 1 and Theorem 3. Sections C, D, E and F give proofs for Theorem 1, Theorem 3, Theorem 2 and Theorem 4, respectively.

## A. A basic lemma

**Lemma 2.** *Let  $h$  be a strictly convex function and  $\mathcal{D}_h$  be its Bregman divergence. Suppose  $\psi$  is  $\nu$ -strongly convex with respect to  $\mathcal{D}_h$  and  $1/\delta$ -smooth (with respect to the Euclidean norm), and*

$$\hat{y} = \arg \min_{y \in C} \{ \psi(y) + \eta \mathcal{D}_h(y, \bar{y}) \},$$

where  $C$  is a compact convex set that lies within the relative interior of the domains of  $h$  and  $\psi$  (i.e., both  $h$  and  $\psi$  are differentiable over  $C$ ). Then for any  $y \in C$  and  $\rho \in [0, 1]$ , we have

$$\psi(y) + \eta \mathcal{D}_h(y, \bar{y}) \geq \psi(\hat{y}) + \eta \mathcal{D}_h(\hat{y}, \bar{y}) + (\eta + (1 - \rho)\nu) \mathcal{D}_h(y, \hat{y}) + \frac{\rho\delta}{2} \|\nabla\psi(y) - \nabla\psi(\hat{y})\|^2.$$

*Proof.* The minimizer  $\hat{y}$  satisfies the following first-order optimality condition:

$$\langle \nabla\psi(\hat{y}) + \eta \nabla \mathcal{D}_h(\hat{y}, \bar{y}), y - \hat{y} \rangle \geq 0, \quad \forall y \in C.$$

Here  $\nabla \mathcal{D}$  denotes partial gradient of the Bregman divergence with respect to its first argument, i.e.,  $\nabla \mathcal{D}(\hat{y}, \bar{y}) = \nabla h(\hat{y}) - \nabla h(\bar{y})$ . So the above optimality condition is the same as

$$\langle \nabla\psi(\hat{y}) + \eta(\nabla h(\hat{y}) - \nabla h(\bar{y})), y - \hat{y} \rangle \geq 0, \quad \forall y \in C. \quad (17)$$

Since  $\psi$  is  $\nu$ -strongly convex with respect to  $\mathcal{D}_h$  and  $1/\delta$ -smooth, we have

$$\begin{aligned} \psi(y) &\geq \psi(\hat{y}) + \langle \nabla\psi(\hat{y}), y - \hat{y} \rangle + \nu \mathcal{D}_h(y, \hat{y}), \\ \psi(y) &\geq \psi(\hat{y}) + \langle \nabla\psi(\hat{y}), y - \hat{y} \rangle + \frac{\delta}{2} \|\nabla\psi(y) - \nabla\psi(\hat{y})\|^2. \end{aligned}$$

For the second inequality, see, e.g., Theorem 2.1.5 in Nesterov (2004). Multiplying the two inequalities above by  $(1 - \rho)$  and  $\rho$  respectively and adding them together, we have

$$\psi(y) \geq \psi(\hat{y}) + \langle \nabla\psi(\hat{y}), y - \hat{y} \rangle + (1 - \rho)\nu \mathcal{D}_h(y, \hat{y}) + \frac{\rho\delta}{2} \|\nabla\psi(y) - \nabla\psi(\hat{y})\|^2.$$

The Bregman divergence  $\mathcal{D}_h$  satisfies the following equality:

$$\mathcal{D}_h(y, \bar{y}) = \mathcal{D}_h(y, \hat{y}) + \mathcal{D}_h(\hat{y}, \bar{y}) + \langle \nabla h(\hat{y}) - \nabla h(\bar{y}), y - \hat{y} \rangle.$$

We multiply this equality by  $\eta$  and add it to the last inequality to obtain

$$\begin{aligned} \psi(y) + \eta \mathcal{D}_h(y, \bar{y}) &\geq \psi(\hat{y}) + \eta \mathcal{D}_h(y, \hat{y}) + (\eta + (1 - \rho)\nu) \mathcal{D}_h(\hat{y}, \bar{y}) + \frac{\rho\delta}{2} \|\nabla\psi(y) - \nabla\psi(\hat{y})\|^2 \\ &\quad + \langle \nabla\psi(\hat{y}) + \eta(\nabla h(\hat{y}) - \nabla h(\bar{y})), y - \hat{y} \rangle. \end{aligned}$$

Using the optimality condition in (17), the last term of inner product is nonnegative and thus can be dropped, which gives the desired inequality.  $\square$

## B. Common Analysis of Batch Primal-Dual Algorithms

We consider the general primal-dual update rule as:

**Iteration:**  $(\hat{x}, \hat{y}) = \text{PD}_{\tau, \sigma}(\bar{x}, \bar{y}, \tilde{x}, \tilde{y})$

$$\hat{x} = \arg \min_{x \in \mathbb{R}^d} \left\{ g(x) + \tilde{y}^T A x + \frac{1}{2\tau} \|x - \bar{x}\|^2 \right\}, \quad (18)$$

$$\hat{y} = \arg \min_{y \in \mathbb{R}^n} \left\{ f^*(y) - y^T A \tilde{x} + \frac{1}{\sigma} \mathcal{D}(y, \bar{y}) \right\}. \quad (19)$$

Each iteration of Algorithm 1 is equivalent to the following specification of  $\text{PD}_{\tau, \sigma}$ :

$$\begin{aligned} \hat{x} &= x^{(t+1)}, & \bar{x} &= x^{(t)}, & \tilde{x} &= x^{(t)} + \theta(x^{(t)} - x^{(t-1)}), \\ \hat{y} &= y^{(t+1)}, & \bar{y} &= y^{(t)}, & \tilde{y} &= y^{(t+1)}. \end{aligned} \quad (20)$$

Besides Assumption 2, we also assume that  $f^*$  is  $\nu$ -strongly convex with respect to a kernel function  $h$ , i.e.,

$$f^*(y') - f^*(y) - \langle \nabla f^*(y), y' - y \rangle \geq \nu \mathcal{D}_h(y', y),$$

where  $\mathcal{D}_h$  is the Bregman divergence defined as

$$\mathcal{D}_h(y', y) = h(y') - h(y) - \langle \nabla h(y), y' - y \rangle.$$

We assume that  $h$  is  $\gamma'$ -strongly convex and  $1/\delta'$ -smooth. Depending on the kernel function  $h$ , this assumption on  $f^*$  may impose additional restrictions on  $f$ . In this paper, we are mostly interested in two special cases:  $h(y) = (1/2)\|y\|^2$  and  $h(y) = f^*(y)$  (for the latter we always have  $\nu = 1$ ). From now on, we will omit the subscript  $h$  and use  $\mathcal{D}$  denote the Bregman divergence.

Under the above assumptions, any solution  $(x^*, y^*)$  to the saddle-point problem (6) satisfies the optimality condition:

$$-A^T y^* \in \partial g(x^*), \quad (21)$$

$$A x^* = \nabla f^*(y^*). \quad (22)$$

The optimality conditions for the updates described in equations (18) and (19) are

$$-A^T \tilde{y} + \frac{1}{\tau}(\bar{x} - \hat{x}) \in \partial g(\hat{x}), \quad (23)$$

$$A \tilde{x} - \frac{1}{\sigma}(\nabla h(\hat{y}) - \nabla h(\bar{y})) = \nabla f^*(\hat{y}). \quad (24)$$

Applying Lemma 2 to the dual minimization step in (19) with  $\psi(y) = f^*(y) - y^T A \tilde{x}$ ,  $\eta = 1/\sigma$ ,  $y = y^*$  and  $\rho = 1/2$ , we obtain

$$\begin{aligned} f^*(y^*) - y^{*T} A \tilde{x} + \frac{1}{\sigma} \mathcal{D}(y^*, \bar{y}) &\geq f^*(\hat{y}) - \hat{y}^T A \tilde{x} + \frac{1}{\sigma} \mathcal{D}(\hat{y}, \bar{y}) \\ &\quad + \left( \frac{1}{\sigma} + \frac{\nu}{2} \right) \mathcal{D}(y^*, \hat{y}) + \frac{\delta}{4} \|\nabla f^*(y^*) - \nabla f^*(\hat{y})\|^2. \end{aligned} \quad (25)$$

Similarly, for the primal minimization step in (18), we have (setting  $\rho = 0$ )

$$g(x^*) + \tilde{y}^T A x^* + \frac{1}{2\tau} \|x^* - \bar{x}\|^2 \geq g(\hat{x}) + \tilde{y}^T A \hat{x} + \frac{1}{2\tau} \|\hat{x} - \bar{x}\|^2 + \frac{1}{2} \left( \frac{1}{\tau} + \lambda \right) \|x^* - \hat{x}\|^2. \quad (26)$$

Combining the two inequalities above with the definition  $\mathcal{L}(x, y) = g(x) + y^T A x - f^*(y)$ , we get

$$\begin{aligned} \mathcal{L}(\hat{x}, y^*) - \mathcal{L}(x^*, \hat{y}) &= g(\hat{x}) + y^{*T} A \hat{x} - f^*(y^*) - g(x^*) - \hat{y}^T A x^* + f^*(\hat{y}) \\ &\leq \frac{1}{2\tau} \|x^* - \bar{x}\|^2 + \frac{1}{\sigma} \mathcal{D}(y^*, \bar{y}) - \frac{1}{2} \left( \frac{1}{\tau} + \lambda \right) \|x^* - \hat{x}\|^2 - \left( \frac{1}{\sigma} + \frac{\nu}{2} \right) \mathcal{D}(y^*, \hat{y}) \\ &\quad - \frac{1}{2\tau} \|\hat{x} - \bar{x}\|^2 - \frac{1}{\sigma} \mathcal{D}(\hat{y}, \bar{y}) - \frac{\delta}{4} \|\nabla f^*(y^*) - \nabla f^*(\hat{y})\|^2 \\ &\quad + y^{*T} A \hat{x} - \hat{y}^T A x^* + \tilde{y}^T A x^* - \tilde{y}^T A \hat{x} - y^{*T} A \tilde{x} + \hat{y}^T A \tilde{x}. \end{aligned}$$

We can simplify the inner product terms as

$$y^{\star T} A \hat{x} - \hat{y}^T A x^{\star} + \tilde{y}^T A x^{\star} - \tilde{y}^T A \hat{x} - y^{\star T} A \tilde{x} + \hat{y}^T A \tilde{x} = (\hat{y} - \tilde{y})^T A (\hat{x} - x^{\star}) - (\hat{y} - y^{\star})^T A (\hat{x} - \tilde{x}).$$

Rearranging terms on the two sides of the inequality, we have

$$\begin{aligned} \frac{1}{2\tau} \|x^{\star} - \bar{x}\|^2 + \frac{1}{\sigma} \mathcal{D}(y^{\star}, \bar{y}) &\geq \mathcal{L}(\hat{x}, y^{\star}) - \mathcal{L}(x^{\star}, \hat{y}) \\ &+ \frac{1}{2} \left( \frac{1}{\tau} + \lambda \right) \|x^{\star} - \hat{x}\|^2 + \left( \frac{1}{\sigma} + \frac{\nu}{2} \right) \mathcal{D}(y^{\star}, \hat{y}) \\ &+ \frac{1}{2\tau} \|\hat{x} - \bar{x}\|^2 + \frac{1}{\sigma} \mathcal{D}(\hat{y}, \bar{y}) + \frac{\delta}{4} \|\nabla f^{\star}(y^{\star}) - \nabla f^{\star}(\hat{y})\|^2 \\ &+ (\hat{y} - y^{\star})^T A (\hat{x} - \tilde{x}) - (\hat{y} - \tilde{y})^T A (\hat{x} - x^{\star}). \end{aligned}$$

Applying the substitutions in (20) yields

$$\begin{aligned} \frac{1}{2\tau} \|x^{\star} - x^{(t)}\|^2 + \frac{1}{\sigma} \mathcal{D}(y^{\star}, y^{(t)}) &\geq \mathcal{L}(x^{(t+1)}, y^{\star}) - \mathcal{L}(x^{\star}, y^{(t+1)}) \\ &+ \frac{1}{2} \left( \frac{1}{\tau} + \lambda \right) \|x^{\star} - x^{(t+1)}\|^2 + \left( \frac{1}{\sigma} + \frac{\nu}{2} \right) \mathcal{D}(y^{\star}, y^{(t+1)}) \\ &+ \frac{1}{2\tau} \|x^{(t+1)} - x^{(t)}\|^2 + \frac{1}{\sigma} \mathcal{D}(y^{(t+1)}, y^{(t)}) + \frac{\delta}{4} \|\nabla f^{\star}(y^{\star}) - \nabla f^{\star}(y^{(t+1)})\|^2 \\ &+ (y^{(t+1)} - y^{\star})^T A (x^{(t+1)} - (x^{(t)} + \theta(x^{(t)} - x^{(t-1)}))). \end{aligned} \quad (27)$$

We can rearrange the inner product term in (27) as

$$\begin{aligned} &(y^{(t+1)} - y^{\star})^T A (x^{(t+1)} - (x^{(t)} + \theta(x^{(t)} - x^{(t-1)}))) \\ = &(y^{(t+1)} - y^{\star})^T A (x^{(t+1)} - x^{(t)}) - \theta (y^{(t)} - y^{\star})^T A (x^{(t)} - x^{(t-1)}) - \theta (y^{(t+1)} - y^{(t)})^T A (x^{(t)} - x^{(t-1)}). \end{aligned}$$

Using the optimality conditions in (22) and (24), we can also bound  $\|\nabla f^{\star}(y^{\star}) - \nabla f^{\star}(y^{(t+1)})\|^2$ :

$$\begin{aligned} &\|\nabla f^{\star}(y^{\star}) - \nabla f^{\star}(y^{(t+1)})\|^2 \\ = &\left\| A x^{\star} - A (x^{(t)} + \theta(x^{(t)} - x^{(t-1)})) + \frac{1}{\sigma} (\nabla h(y^{(t+1)}) - \nabla h(y^{(t)})) \right\|^2 \\ \geq &\left( 1 - \frac{1}{\alpha} \right) \|A(x^{\star} - x^{(t)})\|^2 - (\alpha - 1) \left\| \theta A(x^{(t)} - x^{(t-1)}) - \frac{1}{\sigma} (\nabla h(y^{(t+1)}) - \nabla h(y^{(t)})) \right\|^2, \end{aligned}$$

where  $\alpha > 1$ . With the definition  $\mu = \sqrt{\lambda_{\min}(A^T A)}$ , we also have  $\|A(x^{\star} - x^{(t)})\|^2 \geq \mu^2 \|x^{\star} - x^{(t)}\|^2$ . Combining them with the inequality (27) leads to

$$\begin{aligned} &\frac{1}{2\tau} \|x^{\star} - x^{(t)}\|^2 + \frac{1}{\sigma} \mathcal{D}(y^{\star}, y^{(t)}) + \theta (y^{(t)} - y^{\star})^T A (x^{(t)} - x^{(t-1)}) \\ \geq &\mathcal{L}(x^{(t+1)}, y^{\star}) - \mathcal{L}(x^{\star}, y^{(t+1)}) \\ &+ \frac{1}{2} \left( \frac{1}{\tau} + \lambda \right) \|x^{\star} - x^{(t+1)}\|^2 + \left( \frac{1}{\sigma} + \frac{\nu}{2} \right) \mathcal{D}(y^{\star}, y^{(t+1)}) + (y^{(t+1)} - y^{\star})^T A (x^{(t+1)} - x^{(t)}) \\ &+ \frac{1}{2\tau} \|x^{(t+1)} - x^{(t)}\|^2 + \frac{1}{\sigma} \mathcal{D}(y^{(t+1)}, y^{(t)}) - \theta (y^{(t+1)} - y^{(t)})^T A (x^{(t)} - x^{(t-1)}) \\ &+ \left( 1 - \frac{1}{\alpha} \right) \frac{\delta \mu^2}{4} \|x^{\star} - x^{(t)}\|^2 - (\alpha - 1) \frac{\delta}{4} \left\| \theta A(x^{(t)} - x^{(t-1)}) - \frac{1}{\sigma} (\nabla h(y^{(t+1)}) - \nabla h(y^{(t)})) \right\|^2. \end{aligned} \quad (28)$$

### C. Proof of Theorem 1

Let the kernel function be  $h(y) = (1/2)\|y\|^2$ . In this case, we have  $\mathcal{D}(y', y) = (1/2)\|y' - y\|^2$  and  $\nabla h(y) = y$ . Moreover,  $\gamma' = \delta' = 1$  and  $\nu = \gamma$ . Therefore, the inequality (28) becomes

$$\begin{aligned}
 & \frac{1}{2} \left( \frac{1}{\tau} - \left(1 - \frac{1}{\alpha}\right) \frac{\delta\mu^2}{2} \right) \|x^* - x^{(t)}\|^2 + \frac{1}{2\sigma} \|y^* - y^{(t)}\|^2 + \theta(y^{(t)} - y^*)^T A(x^{(t)} - x^{(t-1)}) \\
 \geq & \mathcal{L}(x^{(t+1)}, y^*) - \mathcal{L}(x^*, y^{(t+1)}) \\
 & + \frac{1}{2} \left( \frac{1}{\tau} + \lambda \right) \|x^* - x^{(t+1)}\|^2 + \frac{1}{2} \left( \frac{1}{\sigma} + \frac{\gamma}{2} \right) \|y^* - y^{(t+1)}\|^2 + (y^{(t+1)} - y^*)^T A(x^{(t+1)} - x^{(t)}) \\
 & + \frac{1}{2\tau} \|x^{(t+1)} - x^{(t)}\|^2 + \frac{1}{2\sigma} \|y^{(t+1)} - y^{(t)}\|^2 - \theta(y^{(t+1)} - y^{(t)})^T A(x^{(t)} - x^{(t-1)}) \\
 & - (\alpha - 1) \frac{\delta}{4} \left\| \theta A(x^{(t)} - x^{(t-1)}) - \frac{1}{\sigma} (y^{(t+1)} - y^{(t)}) \right\|^2. \tag{29}
 \end{aligned}$$

Next we derive another form of the underlined items above:

$$\begin{aligned}
 & \frac{1}{2\sigma} \|y^{(t+1)} - y^{(t)}\|^2 - \theta(y^{(t+1)} - y^{(t)})^T A(x^{(t)} - x^{(t-1)}) \\
 = & \frac{\sigma}{2} \left( \frac{1}{\sigma^2} \|y^{(t+1)} - y^{(t)}\|^2 - \frac{\theta}{\sigma} (y^{(t+1)} - y^{(t)})^T A(x^{(t)} - x^{(t-1)}) \right) \\
 = & \frac{\sigma}{2} \left( \left\| \theta A(x^{(t)} - x^{(t-1)}) - \frac{1}{\sigma} (y^{(t+1)} - y^{(t)}) \right\|^2 - \theta^2 \|A(x^{(t)} - x^{(t-1)})\|^2 \right) \\
 \geq & \frac{\sigma}{2} \left\| \theta A(x^{(t)} - x^{(t-1)}) - \frac{1}{\sigma} (y^{(t+1)} - y^{(t)}) \right\|^2 - \frac{\sigma\theta^2 L^2}{2} \|x^{(t)} - x^{(t-1)}\|^2,
 \end{aligned}$$

where in the last inequality we used  $\|A\| \leq L$  and hence  $\|A(x^{(t)} - x^{(t-1)})\|^2 \leq L^2 \|x^{(t)} - x^{(t-1)}\|^2$ . Combining with inequality (29), we have

$$\begin{aligned}
 & \frac{1}{2} \left( \frac{1}{\tau} - \left(1 - \frac{1}{\alpha}\right) \frac{\delta\mu^2}{2} \right) \|x^{(t)} - x^*\|^2 + \frac{1}{2\sigma} \|y^{(t)} - y^*\|^2 + \theta(y^{(t)} - y^*)^T A(x^{(t)} - x^{(t-1)}) + \frac{\sigma\theta^2 L^2}{2} \|x^{(t)} - x^{(t-1)}\|^2 \\
 \geq & \mathcal{L}(x^{(t+1)}, y^*) - \mathcal{L}(x^*, y^{(t+1)}) \\
 & + \frac{1}{2} \left( \frac{1}{\tau} + \lambda \right) \|x^{(t+1)} - x^*\|^2 + \frac{1}{2} \left( \frac{1}{\sigma} + \frac{\gamma}{2} \right) \|y^{(t+1)} - y^*\|^2 + (y^{(t+1)} - y^*)^T A(x^{(t+1)} - x^{(t)}) + \frac{1}{2\tau} \|x^{(t+1)} - x^{(t)}\|^2 \\
 & + \left( \frac{\sigma}{2} - (\alpha - 1) \frac{\delta}{4} \right) \left\| \theta A(x^{(t)} - x^{(t-1)}) - \frac{1}{\sigma} (y^{(t+1)} - y^{(t)}) \right\|^2. \tag{30}
 \end{aligned}$$

We can remove the last term in the above inequality as long as its coefficient is nonnegative, i.e.,

$$\frac{\sigma}{2} - (\alpha - 1) \frac{\delta}{4} \geq 0.$$

In order to maximize  $1 - 1/\alpha$ , we take the equality and solve for the largest value of  $\alpha$  allowed, which results in

$$\alpha = 1 + \frac{2\sigma}{\delta}, \quad 1 - \frac{1}{\alpha} = \frac{2\sigma}{2\sigma + \delta}.$$

Applying these values in (30) gives

$$\begin{aligned}
 & \frac{1}{2} \left( \frac{1}{\tau} - \frac{\sigma\delta\mu^2}{2\sigma + \delta} \right) \|x^{(t)} - x^*\|^2 + \frac{1}{2\sigma} \|y^{(t)} - y^*\|^2 + \theta(y^{(t)} - y^*)^T A(x^{(t)} - x^{(t-1)}) + \frac{\sigma\theta^2 L^2}{2} \|x^{(t)} - x^{(t-1)}\|^2 \\
 \geq & \mathcal{L}(x^{(t+1)}, y^*) - \mathcal{L}(x^*, y^{(t+1)}) \\
 & + \frac{1}{2} \left( \frac{1}{\tau} + \lambda \right) \|x^{(t+1)} - x^*\|^2 + \frac{1}{2} \left( \frac{1}{\sigma} + \frac{\gamma}{2} \right) \|y^{(t+1)} - y^*\|^2 + (y^{(t+1)} - y^*)^T A(x^{(t+1)} - x^{(t)}) + \frac{1}{2\tau} \|x^{(t+1)} - x^{(t)}\|^2. \tag{31}
 \end{aligned}$$

We use  $\Delta^{(t+1)}$  to denote the last row in (31). Equivalently, we define

$$\begin{aligned}\Delta^{(t)} &= \frac{1}{2}\left(\frac{1}{\tau} + \lambda\right)\|x^* - x^{(t)}\|^2 + \frac{1}{2}\left(\frac{1}{\sigma} + \frac{\gamma}{2}\right)\|y^* - y^{(t)}\|^2 + (y^{(t)} - y^*)^T A(x^{(t)} - x^{(t-1)}) + \frac{1}{2\tau}\|x^{(t)} - x^{(t-1)}\|^2 \\ &= \frac{1}{2}\left(\frac{1}{\tau} + \lambda\right)\|x^* - x^{(t)}\|^2 + \frac{\gamma}{4}\|y^* - y^{(t)}\|^2 + \frac{1}{2}\begin{bmatrix} x^{(t)} - x^{(t-1)} \\ y^* - y^{(t)} \end{bmatrix}^T \begin{bmatrix} \frac{1}{\tau}I & -A^T \\ -A & \frac{1}{\sigma} \end{bmatrix} \begin{bmatrix} x^{(t)} - x^{(t-1)} \\ y^* - y^{(t)} \end{bmatrix}.\end{aligned}$$

The quadratic form in the last term is nonnegative if the matrix

$$M = \begin{bmatrix} \frac{1}{\tau}I & -A^T \\ -A & \frac{1}{\sigma} \end{bmatrix}$$

is positive semidefinite, for which a sufficient condition is  $\tau\sigma \leq 1/L^2$ . Under this condition,

$$\Delta^{(t)} \geq \frac{1}{2}\left(\frac{1}{\tau} + \lambda\right)\|x^* - x^{(t)}\|^2 + \frac{\gamma}{4}\|y^* - y^{(t)}\|^2 \geq 0. \quad (32)$$

If we can to choose  $\tau$  and  $\sigma$  so that

$$\frac{1}{\tau} - \frac{\sigma\delta\mu^2}{2\sigma + \delta} \leq \theta\left(\frac{1}{\tau} + \lambda\right), \quad \frac{1}{\sigma} \leq \theta\left(\frac{1}{\sigma} + \frac{\gamma}{2}\right), \quad \frac{\sigma\theta^2 L^2}{2} \leq \theta\frac{1}{2\tau}, \quad (33)$$

then, according to (31), we have

$$\Delta^{(t+1)} + \mathcal{L}(x^{(t+1)}, y^*) - \mathcal{L}(x^*, y^{(t+1)}) \leq \theta\Delta^{(t)}.$$

Because  $\Delta^{(t)} \geq 0$  and  $\mathcal{L}(x^{(t)}, y^*) - \mathcal{L}(x^*, y^{(t)}) \geq 0$  for any  $t \geq 0$ , we have

$$\Delta^{(t+1)} \leq \theta\Delta^{(t)},$$

which implies

$$\Delta^{(t)} \leq \theta^t \Delta^{(0)}$$

and

$$\mathcal{L}(x^{(t)}, y^*) - \mathcal{L}(x^*, y^{(t)}) \leq \theta^t \Delta^{(0)}.$$

Let  $\theta_x$  and  $\theta_y$  be two contraction factors determined by the first two inequalities in (33), i.e.,

$$\begin{aligned}\theta_x &= \left(\frac{1}{\tau} - \frac{\sigma\delta\mu^2}{2\sigma + \delta}\right) / \left(\frac{1}{\tau} + \lambda\right) = \left(1 - \frac{\tau\sigma\delta\mu^2}{2\sigma + \delta}\right) \frac{1}{1 + \tau\lambda}, \\ \theta_y &= \frac{1}{\sigma} / \left(\frac{1}{\sigma} + \frac{\gamma}{2}\right) = \frac{1}{1 + \sigma\gamma/2}.\end{aligned}$$

Then we can let  $\theta = \max\{\theta_x, \theta_y\}$ . We note that any  $\theta < 1$  would satisfy the last condition in (33) provided that

$$\tau\sigma = \frac{1}{L^2},$$

which also makes the matrix  $M$  positive semidefinite and thus ensures the inequality (32).

Among all possible pairs  $\tau, \sigma$  that satisfy  $\tau\sigma = 1/L^2$ , we choose

$$\tau = \frac{1}{L}\sqrt{\frac{\gamma}{\lambda + \delta\mu^2}}, \quad \sigma = \frac{1}{L}\sqrt{\frac{\lambda + \delta\mu^2}{\gamma}}, \quad (34)$$

which give the desired results of Theorem 1.

## D. Proof of Theorem 3

If we choose  $h = f^*$ , then

- $h$  is  $\gamma$ -strongly convex and  $1/\delta$ -smooth, i.e.,  $\gamma' = \gamma$  and  $\delta' = \delta$ ;
- $f^*$  is 1-strongly convex with respect to  $h$ , i.e.,  $\nu = 1$ .

For convenience, we repeat inequality (28) here:

$$\begin{aligned}
 & \frac{1}{2\tau} \|x^* - x^{(t)}\|^2 + \frac{1}{\sigma} \mathcal{D}(y^*, y^{(t)}) + \theta(y^{(t)} - y^*)^T A(x^{(t)} - x^{(t-1)}) \\
 \geq & \mathcal{L}(x^{(t+1)}, y^*) - \mathcal{L}(x^*, y^{(t+1)}) \\
 & + \frac{1}{2} \left( \frac{1}{\tau} + \lambda \right) \|x^* - x^{(t+1)}\|^2 + \left( \frac{1}{\sigma} + \frac{\nu}{2} \right) \mathcal{D}(y^*, y^{(t+1)}) + (y^{(t+1)} - y^*)^T A(x^{(t+1)} - x^{(t)}) \\
 & + \frac{1}{2\tau} \|x^{(t+1)} - x^{(t)}\|^2 + \frac{1}{\sigma} \mathcal{D}(y^{(t+1)}, y^{(t)}) - \theta(y^{(t+1)} - y^{(t)})^T A(x^{(t)} - x^{(t-1)}) \\
 & + \left( 1 - \frac{1}{\alpha} \right) \frac{\delta \mu^2}{4} \|x^* - x^{(t)}\|^2 - (\alpha - 1) \frac{\delta}{4} \left\| \theta A(x^{(t)} - x^{(t-1)}) - \frac{1}{\sigma} (\nabla h(y^{(t+1)}) - \nabla h(y^{(t)})) \right\|^2. \quad (35)
 \end{aligned}$$

We first bound the Bregman divergence  $\mathcal{D}(y^{(t+1)}, y^{(t)})$  using the assumption that the kernel  $h$  is  $\gamma$ -strongly convex and  $1/\delta$ -smooth. Using similar arguments as in the proof of Lemma 2, we have for any  $\rho \in [0, 1]$ ,

$$\begin{aligned}
 \mathcal{D}(y^{(t+1)}, y^{(t)}) &= h(y^{(t+1)}) - h(y^{(t)}) - \langle \nabla h(y^{(t)}), y^{(t+1)} - y^{(t)} \rangle \\
 &\geq (1 - \rho) \frac{\gamma}{2} \|y^{(t+1)} - y^{(t)}\|^2 + \rho \frac{\delta}{2} \left\| \nabla h(y^{(t+1)}) - \nabla h(y^{(t)}) \right\|^2. \quad (36)
 \end{aligned}$$

For any  $\beta > 0$ , we can lower bound the inner product term

$$-\theta(y^{(t+1)} - y^{(t)})^T A(x^{(t)} - x^{(t-1)}) \geq -\frac{\beta}{2} \|y^{(t+1)} - y^{(t)}\|^2 - \frac{\theta^2 L^2}{2\beta} \|x^{(t)} - x^{(t-1)}\|^2.$$

In addition, we have

$$\left\| \theta A(x^{(t)} - x^{(t-1)}) - \frac{1}{\sigma} (\nabla h(y^{(t+1)}) - \nabla h(y^{(t)})) \right\|^2 \leq 2\theta^2 L^2 \|x^{(t)} - x^{(t-1)}\|^2 + \frac{2}{\sigma^2} \left\| \nabla h(y^{(t+1)}) - \nabla h(y^{(t)}) \right\|^2.$$

Combining these bounds with (35) and (36) with  $\rho = 1/2$ , we arrive at

$$\begin{aligned}
 & \frac{1}{2} \left( \frac{1}{\tau} - \left( 1 - \frac{1}{\alpha} \right) \frac{\delta \mu^2}{2} \right) \|x^* - x^{(t)}\|^2 + \frac{1}{\sigma} \mathcal{D}(y^*, y^{(t)}) + \theta(y^{(t)} - y^*)^T A(x^{(t)} - x^{(t-1)}) \\
 & + \left( \frac{\theta^2 L^2}{2\beta} + (\alpha - 1) \frac{\delta \theta^2 L^2}{2} \right) \|x^{(t)} - x^{(t-1)}\|^2 \\
 \geq & \mathcal{L}(x^{(t+1)}, y^*) - \mathcal{L}(x^*, y^{(t+1)}) \\
 & + \frac{1}{2} \left( \frac{1}{\tau} + \lambda \right) \|x^* - x^{(t+1)}\|^2 + \left( \frac{1}{\sigma} + \frac{1}{2} \right) \mathcal{D}(y^*, y^{(t+1)}) + (y^{(t+1)} - y^*)^T A(x^{(t+1)} - x^{(t)}) \\
 & + \left( \frac{\gamma}{4\sigma} - \frac{\beta}{2} \right) \|y^{(t+1)} - y^{(t)}\|^2 + \left( \frac{\delta}{4\sigma} - \frac{(\alpha - 1)\delta}{2\sigma^2} \right) \left\| \nabla h(y^{(t+1)}) - \nabla h(y^{(t)}) \right\|^2 \\
 & + \frac{1}{2\tau} \|x^{(t+1)} - x^{(t)}\|^2. \quad (37)
 \end{aligned}$$

We choose  $\alpha$  and  $\beta$  in (37) to zero out the coefficients of  $\|y^{(t+1)} - y^{(t)}\|^2$  and  $\left\| \nabla h(y^{(t+1)}) - \nabla h(y^{(t)}) \right\|^2$ :

$$\alpha = 1 + \frac{\sigma}{2}, \quad \beta = \frac{\gamma}{2\sigma}.$$

Then the inequality (37) becomes

$$\begin{aligned}
 & \frac{1}{2} \left( \frac{1}{\tau} - \frac{\sigma\delta\mu^2}{4+2\sigma} \right) \|x^* - x^{(t)}\|^2 + \frac{1}{\sigma} \mathcal{D}(y^*, y^{(t)}) + \theta(y^{(t)} - y^*)^T A(x^{(t)} - x^{(t-1)}) \\
 & + \left( \frac{\sigma\theta^2 L^2}{\gamma} + \frac{\delta\sigma\theta^2 L^2}{4} \right) \|x^{(t)} - x^{(t-1)}\|^2 \\
 \geq & \mathcal{L}(x^{(t+1)}, y^*) - \mathcal{L}(x^*, y^{(t+1)}) \\
 & + \frac{1}{2} \left( \frac{1}{\tau} + \lambda \right) \|x^* - x^{(t+1)}\|^2 + \left( \frac{1}{\sigma} + \frac{1}{2} \right) \mathcal{D}(y^*, y^{(t+1)}) + (y^{(t+1)} - y^*)^T A(x^{(t+1)} - x^{(t)}) \\
 & + \frac{1}{2\tau} \|x^{(t+1)} - x^{(t)}\|^2.
 \end{aligned}$$

The coefficient of  $\|x^{(t)} - x^{(t-1)}\|^2$  can be bounded as

$$\frac{\sigma\theta^2 L^2}{\gamma} + \frac{\delta\sigma\theta^2 L^2}{4} = \left( \frac{1}{\gamma} + \frac{\delta}{4} \right) \sigma\theta^2 L^2 = \frac{4 + \gamma\delta}{4\gamma} \sigma\theta^2 L^2 < \frac{2\sigma\theta^2 L^2}{\gamma},$$

where in the inequality we used  $\gamma\delta \leq 1$ . Therefore we have

$$\begin{aligned}
 & \frac{1}{2} \left( \frac{1}{\tau} - \frac{\sigma\delta\mu^2}{4+2\sigma} \right) \|x^* - x^{(t)}\|^2 + \frac{1}{\sigma} \mathcal{D}(y^*, y^{(t)}) + \theta(y^{(t)} - y^*)^T A(x^{(t)} - x^{(t-1)}) + \frac{2\sigma\theta^2 L^2}{\gamma} \|x^{(t)} - x^{(t-1)}\|^2 \\
 \geq & \mathcal{L}(x^{(t+1)}, y^*) - \mathcal{L}(x^*, y^{(t+1)}) \\
 & + \frac{1}{2} \left( \frac{1}{\tau} + \lambda \right) \|x^* - x^{(t+1)}\|^2 + \left( \frac{1}{\sigma} + \frac{1}{2} \right) \mathcal{D}(y^*, y^{(t+1)}) + (y^{(t+1)} - y^*)^T A(x^{(t+1)} - x^{(t)}) + \frac{1}{2\tau} \|x^{(t+1)} - x^{(t)}\|^2.
 \end{aligned}$$

We use  $\Delta^{(t+1)}$  to denote the last row of the above inequality. Equivalently, we define

$$\Delta^{(t)} = \frac{1}{2} \left( \frac{1}{\tau} + \lambda \right) \|x^* - x^{(t)}\|^2 + \left( \frac{1}{\sigma} + \frac{1}{2} \right) \mathcal{D}(y^*, y^{(t)}) + (y^{(t)} - y^*)^T A(x^{(t)} - x^{(t-1)}) + \frac{1}{2\tau} \|x^{(t)} - x^{(t-1)}\|^2.$$

Since  $h$  is  $\gamma$ -strongly convex, we have  $\mathcal{D}(y^*, y^{(t)}) \geq \frac{\gamma}{2} \|y^* - y^{(t)}\|^2$ , and thus

$$\begin{aligned}
 \Delta^{(t)} & \geq \frac{1}{2} \left( \frac{1}{\tau} + \lambda \right) \|x^* - x^{(t)}\|^2 + \frac{1}{2} \mathcal{D}(y^*, y^{(t)}) + \frac{\gamma}{2\sigma} \|y^{(t)} - y^*\|^2 + (y^{(t)} - y^*)^T A(x^{(t)} - x^{(t-1)}) + \frac{1}{2\tau} \|x^{(t)} - x^{(t-1)}\|^2 \\
 & = \frac{1}{2} \left( \frac{1}{\tau} + \lambda \right) \|x^* - x^{(t)}\|^2 + \frac{1}{2} \mathcal{D}(y^*, y^{(t)}) + \frac{1}{2} \begin{bmatrix} x^{(t)} - x^{(t-1)} \\ y^* - y^{(t)} \end{bmatrix}^T \begin{bmatrix} \frac{1}{\tau} I & -A^T \\ -A & \frac{\gamma}{\sigma} \end{bmatrix} \begin{bmatrix} x^{(t)} - x^{(t-1)} \\ y^* - y^{(t)} \end{bmatrix}.
 \end{aligned}$$

The quadratic form in the last term is nonnegative if  $\tau\sigma \leq \gamma/L^2$ . Under this condition,

$$\Delta^{(t)} \geq \frac{1}{2} \left( \frac{1}{\tau} + \lambda \right) \|x^* - x^{(t)}\|^2 + \frac{1}{2} \mathcal{D}(y^*, y^{(t)}) \geq 0. \tag{38}$$

If we can to choose  $\tau$  and  $\sigma$  so that

$$\frac{1}{\tau} - \frac{\sigma\delta\mu^2}{4+2\sigma} \leq \theta \left( \frac{1}{\tau} + \lambda \right), \quad \frac{1}{\sigma} \leq \theta \left( \frac{1}{\sigma} + \frac{1}{2} \right), \quad \frac{2\sigma\theta^2 L^2}{\gamma} \leq \theta \frac{1}{2\tau}, \tag{39}$$

then we have

$$\Delta^{(t+1)} + \mathcal{L}(x^{(t+1)}, y^*) - \mathcal{L}(x^*, y^{(t+1)}) \leq \theta \Delta^{(t)}.$$

Because  $\Delta^{(t)} \geq 0$  and  $\mathcal{L}(x^{(t)}, y^*) - \mathcal{L}(x^*, y^{(t)}) \geq 0$  for any  $t \geq 0$ , we have

$$\Delta^{(t+1)} \leq \theta \Delta^{(t)},$$

which implies

$$\Delta^{(t)} \leq \theta^t \Delta^{(0)}$$

and

$$\mathcal{L}(x^{(t)}, y^*) - \mathcal{L}(x^*, y^{(t)}) \leq \theta^t \Delta^{(0)}.$$

To satisfy the last condition in (39) and also ensure the inequality (38), it suffices to have

$$\tau\sigma \leq \frac{\gamma}{4L^2}.$$

We choose

$$\tau = \frac{1}{2L} \sqrt{\frac{\gamma}{\lambda + \delta\mu^2}}, \quad \sigma = \frac{1}{2L} \sqrt{\gamma(\lambda + \delta\mu^2)}.$$

With the above choice and assuming  $\gamma(\lambda + \delta\mu^2) \ll L^2$ , we have

$$\theta_y = \frac{\frac{1}{\sigma}}{\frac{1}{\sigma} + \frac{1}{2}} = \frac{1}{1 + \sigma/2} = \frac{1}{1 + \sqrt{\gamma(\lambda + \delta\mu^2)}/(4L)} \approx 1 - \frac{\sqrt{\gamma(\lambda + \delta\mu^2)}}{4L}.$$

For the contraction factor over the primal variables, we have

$$\theta_x = \frac{\frac{1}{\tau} - \frac{\sigma\delta\mu^2}{4+2\sigma}}{\frac{1}{\tau} + \lambda} = \frac{1 - \frac{\tau\sigma\delta\mu^2}{4+2\sigma}}{1 + \tau\lambda} = \frac{1 - \frac{\gamma\delta\mu^2}{4(4+2\sigma)L^2}}{1 + \tau\lambda} \approx 1 - \frac{\gamma\delta\mu^2}{16L^2} - \frac{\lambda}{2L} \sqrt{\frac{\gamma}{\lambda + \delta\mu^2}}.$$

This finishes the proof of Theorem 3.

## E. Proof of Theorem 2

We consider the SPDC algorithm in the Euclidean case with  $h(x) = (1/2)\|x\|^2$ . The corresponding batch case analysis is given in Section C. For each  $i = 1, \dots, n$ , let  $\tilde{y}_i$  be

$$\tilde{y}_i = \arg \min_y \left\{ \phi_i^*(y) + \frac{(y - y_i^{(t)})^2}{2\sigma} - y \langle a_i, \tilde{x}^{(t)} \rangle \right\}.$$

Based on the first-order optimality condition, we have

$$\langle a_i, \tilde{x}^{(t)} \rangle - \frac{(\tilde{y}_i - y_i^{(t)})}{\sigma} \in \phi_i^{*'}(\tilde{y}_i).$$

Also, since  $y_i^*$  minimizes  $\phi_i^*(y) - y \langle a_i, x^* \rangle$ , we have

$$\langle a_i, x^* \rangle \in \phi_i^{*'}(y_i^*).$$

By Lemma 2 with  $\rho = 1/2$ , we have

$$\begin{aligned} -y_i^* \langle a_i, \tilde{x}^{(t)} \rangle + \phi_i^*(y_i^*) + \frac{(y_i^{(t)} - y_i^*)^2}{2\sigma} &\geq \left( \frac{1}{\sigma} + \frac{\gamma}{2} \right) \frac{(\tilde{y}_i - y_i^*)^2}{2} + \phi_i^*(\tilde{y}_i) - \tilde{y}_i \langle a_i, \tilde{x}^{(t)} \rangle \\ &\quad + \frac{(\tilde{y}_i - y_i^{(t)})^2}{2\sigma} + \frac{\delta}{4} (\phi_i^{*'}(\tilde{y}_i) - \phi_i^{*'}(y_i^*))^2, \end{aligned}$$

and re-arranging terms, we get

$$\begin{aligned} \frac{(y_i^{(t)} - y_i^*)^2}{2\sigma} &\geq \left( \frac{1}{\sigma} + \frac{\gamma}{2} \right) \frac{(\tilde{y}_i - y_i^*)^2}{2} + \frac{(\tilde{y}_i - y_i^{(t)})^2}{2\sigma} - (\tilde{y}_i - y_i^*) \langle a_i, \tilde{x}^{(t)} \rangle + (\phi_i^*(\tilde{y}_i) - \phi_i^*(y_i^*)) \\ &\quad + \frac{\delta}{4} (\phi_i^{*'}(\tilde{y}_i) - \phi_i^{*'}(y_i^*))^2. \end{aligned} \tag{40}$$



Notice that

$$\begin{aligned}\mathbb{E}[y_i^{(t+1)}] &= \frac{1}{n} \cdot \tilde{y}_i + \frac{n-1}{n} \cdot y_i^{(t)}, \\ \mathbb{E}[(y_i^{(t+1)} - y_i^*)^2] &= \frac{(\tilde{y}_i - y_i^*)^2}{n} + \frac{(n-1)(y_i^{(t)} - y_i^*)^2}{n}, \\ \mathbb{E}[(y_i^{(t+1)} - y_i^{(t)})^2] &= \frac{(\tilde{y}_i - y_i^{(t)})^2}{n}, \\ \mathbb{E}[\phi_i^*(y_i^{(t+1)})] &= \frac{1}{n} \cdot \phi_i^*(\tilde{y}_i) + \frac{n-1}{n} \cdot \phi_i^*(y_i^{(t)}).\end{aligned}$$

Plug the above relations into (40) and divide both sides by  $n$ , we have

$$\begin{aligned}\left(\frac{1}{2\sigma} + \frac{(n-1)\gamma}{4n}\right) (y_i^{(t)} - y_i^*)^2 &\geq \left(\frac{1}{2\sigma} + \frac{\gamma}{4}\right) \mathbb{E}[(y_i^{(t+1)} - y_i^*)^2] + \frac{1}{2\sigma} \mathbb{E}[(y_i^{(t+1)} - y_i^{(t)})^2] \\ &\quad - \left(\mathbb{E}[(y_i^{(t+1)} - y_i^{(t)})] + \frac{1}{n}(y_i^{(t)} - y_i^*)\right) \langle a_i, \tilde{x}^{(t)} \rangle \\ &\quad + \mathbb{E}[\phi_i^*(y_i^{(t+1)})] - \phi_i^*(y_i^{(t)}) + \frac{1}{n}(\phi_i^*(y_i^{(t)}) - \phi_i^*(y_i^*)) \\ &\quad + \frac{\delta}{4n} \left( \langle a_i, \tilde{x}^{(t)} - x^* \rangle - \frac{(\tilde{y}_i - y_i^{(t)})}{\sigma} \right)^2,\end{aligned}$$

and summing over  $i = 1, \dots, n$ , we get

$$\begin{aligned}\left(\frac{1}{2\sigma} + \frac{(n-1)\gamma}{4n}\right) \|y^{(t)} - y^*\|^2 &\geq \left(\frac{1}{2\sigma} + \frac{\gamma}{4}\right) \mathbb{E}[\|y^{(t+1)} - y^*\|^2] + \frac{\mathbb{E}[\|y^{(t+1)} - y^{(t)}\|^2]}{2\sigma} \\ &\quad + \phi_k^*(y_k^{(t+1)}) - \phi_k^*(y_k^{(t)}) + \frac{1}{n} \sum_{i=1}^n (\phi_i^*(y_i^{(t)}) - \phi_i^*(y_i^*)) \\ &\quad - \left\langle n(u^{(t+1)} - u^{(t)}) + (u^{(t)} - u^*), \tilde{x}^{(t)} \right\rangle \\ &\quad + \frac{\delta}{4n} \left\| A(x^* - \tilde{x}^{(t)}) + \frac{(\tilde{y} - y^{(t)})}{\sigma} \right\|^2,\end{aligned}$$

where

$$u^{(t)} = \frac{1}{n} \sum_{i=1}^n y_i^{(t)} a_i, \quad u^{(t+1)} = \frac{1}{n} \sum_{i=1}^n y_i^{(t+1)} a_i, \quad \text{and} \quad u^* = \frac{1}{n} \sum_{i=1}^n y_i^* a_i.$$

On the other hand, since  $x^{(t+1)}$  minimizes the  $\frac{1}{\tau} + \lambda$ -strongly convex objective

$$g(x) + \left\langle u^{(t)} + n(u^{(t+1)} - u^{(t)}), x \right\rangle + \frac{\|x - x^{(t)}\|^2}{2\tau},$$

we can apply Lemma 2 with  $\rho = 0$  to obtain

$$\begin{aligned}g(x^*) + \langle u^{(t)} + n(u^{(t+1)} - u^{(t)}), x^* \rangle + \frac{\|x^{(t)} - x^*\|^2}{2\tau} \\ \geq g(x^{(t+1)}) + \langle u^{(t)} + n(u^{(t+1)} - u^{(t)}), x^{(t+1)} \rangle + \frac{\|x^{(t+1)} - x^{(t)}\|^2}{2\tau} + \left(\frac{1}{2\tau} + \frac{\lambda}{2}\right) \|x^{(t+1)} - x^*\|^2,\end{aligned}$$

and re-arranging terms we get

$$\begin{aligned}\frac{\|x^{(t)} - x^*\|^2}{2\tau} &\geq \left(\frac{1}{2\tau} + \frac{\lambda}{2}\right) \mathbb{E}[\|x^{(t+1)} - x^*\|^2] + \frac{\mathbb{E}[\|x^{(t+1)} - x^{(t)}\|^2]}{2\tau} + \mathbb{E}[g(x^{(t+1)}) - g(x^*)] \\ &\quad + \mathbb{E}[\langle u^{(t)} + n(u^{(t+1)} - u^{(t)}), x^{(t+1)} - x^* \rangle].\end{aligned}$$

Also notice that

$$\begin{aligned} & \mathcal{L}(x^{(t+1)}, y^*) - \mathcal{L}(x^*, y^*) + n(\mathcal{L}(x^*, y^*) - \mathcal{L}(x^*, y^{(t+1)})) - (n-1)(\mathcal{L}(x^*, y^*) - \mathcal{L}(x^*, y^{(t)})) \\ &= \frac{1}{n} \sum_{i=1}^n (\phi_i^*(y_i^{(t)}) - \phi_i^*(y^*)) + (\phi_k^*(y_k^{(t+1)}) - \phi_k^*(y_k^{(t)})) + g(x^{(t+1)}) - g(x^*) \\ &+ \langle u^*, x^{(t+1)} \rangle - \langle u^{(t)}, x^* \rangle + n \langle u^{(t)} - u^{(t+1)}, x^* \rangle. \end{aligned}$$

Combining everything together, we have

$$\begin{aligned} & \frac{\|x^{(t)} - x^*\|^2}{2\tau} + \left( \frac{1}{2\sigma} + \frac{(n-1)\gamma}{4n} \right) \|y^{(t)} - y^*\|^2 + (n-1)(\mathcal{L}(x^*, y^*) - \mathcal{L}(x^*, y^{(t)})) \\ & \geq \left( \frac{1}{2\tau} + \frac{\lambda}{2} \right) \mathbb{E}[\|x^{(t+1)} - x^*\|^2] + \left( \frac{1}{2\sigma} + \frac{\gamma}{4} \right) \mathbb{E}[\|y^{(t+1)} - y^*\|^2] + \frac{\mathbb{E}[\|x^{(t+1)} - x^{(t)}\|^2]}{2\tau} + \frac{\mathbb{E}[\|y^{(t+1)} - y^{(t)}\|^2]}{2\sigma} \\ & + \mathbb{E}[\mathcal{L}(x^{(t+1)}, y^*) - \mathcal{L}(x^*, y^*) + n(\mathcal{L}(x^*, y^*) - \mathcal{L}(x^*, y^{(t+1)}))] \\ & + \mathbb{E}[\langle u^{(t)} - u^* + n(u^{(t+1)} - u^{(t)}), x^{(t+1)} - \tilde{x}^{(t)} \rangle] + \frac{\delta}{4n} \left\| A(x^* - \tilde{x}^{(t)}) + \frac{(\tilde{y} - y^{(t)})}{\sigma} \right\|^2. \end{aligned}$$

Next we notice that

$$\begin{aligned} & \frac{\delta}{4n} \left\| A(x^* - \tilde{x}^{(t)}) + \frac{n(\mathbb{E}[y^{(t+1)}) - y^{(t)}]}{\sigma} \right\|^2 = \frac{\delta}{4n} \left\| A(x^* - x^{(t)}) - \theta A(x^{(t)} - x^{(t-1)}) + \frac{(\tilde{y} - y^{(t)})}{\sigma} \right\|^2 \\ & \geq \left( 1 - \frac{1}{\alpha} \right) \frac{\delta}{4n} \left\| A(x^* - x^{(t)}) \right\|^2 \\ & \quad - (\alpha - 1) \frac{\delta}{4n} \left\| \theta A(x^{(t)} - x^{(t-1)}) + \frac{(\tilde{y} - y^{(t)})}{\sigma} \right\|^2, \end{aligned}$$

for some  $\alpha > 1$  and

$$\left\| A(x^* - x^{(t)}) \right\|^2 \geq \mu^2 \|x^* - x^{(t)}\|^2,$$

and

$$\begin{aligned} & \left\| \theta A(x^{(t)} - x^{(t-1)}) + \frac{(\tilde{y} - y^{(t)})}{\sigma} \right\|^2 \geq -2\theta^2 \|A(x^{(t)} - x^{(t-1)})\|^2 - \frac{2}{\sigma^2} \|\tilde{y} - y^{(t)}\|^2 \\ & \geq -2\theta^2 L^2 \|x^{(t)} - x^{(t-1)}\|^2 - \frac{2n}{\sigma^2} \mathbb{E}[\|y^{(t+1)} - y^{(t)}\|^2]. \end{aligned}$$

We follow the same reasoning as in the standard SPDC analysis,

$$\begin{aligned} & \langle u^{(t)} - u^* + n(u^{(t+1)} - u^{(t)}), x^{(t+1)} - \tilde{x}^{(t)} \rangle = \frac{(y^{(t+1)} - y^*)^T A(x^{(t+1)} - x^{(t)})}{n} - \frac{\theta(y^{(t)} - y^*)^T A(x^{(t)} - x^{(t-1)})}{n} \\ & + \frac{(n-1)}{n} (y^{(t+1)} - y^{(t)})^T A(x^{(t+1)} - x^{(t)}) - \theta(y^{(t+1)} - y^{(t)})^T A(x^{(t)} - x^{(t-1)}), \end{aligned}$$

and using Cauchy-Schwartz inequality, we have

$$\begin{aligned} & |(y^{(t+1)} - y^{(t)})^T A(x^{(t)} - x^{(t-1)})| \leq \frac{\|(y^{(t+1)} - y^{(t)})^T A\|^2}{1/(2\tau)} + \frac{\|x^{(t)} - x^{(t-1)}\|^2}{8\tau} \\ & \leq \frac{\|y^{(t+1)} - y^{(t)}\|^2}{1/(2\tau R^2)}, \end{aligned}$$

and

$$\begin{aligned} & |(y^{(t+1)} - y^{(t)})^T A(x^{(t+1)} - x^{(t)})| \leq \frac{\|(y^{(t+1)} - y^{(t)})^T A\|^2}{1/(2\tau)} + \frac{\|x^{(t+1)} - x^{(t)}\|^2}{8\tau} \\ & \leq \frac{\|y^{(t+1)} - y^{(t)}\|^2}{1/(2\tau R^2)}. \end{aligned}$$

Thus we get

$$\begin{aligned} \langle u^{(t)} - u^* + n(u^{(t+1)} - u^{(t)}), x^{(t+1)} - \tilde{x}^{(t)} \rangle &\geq \frac{(y^{(t+1)} - y^*)^T A(x^{(t+1)} - x^{(t)})}{n} - \frac{\theta(y^{(t)} - y^*)^T A(x^{(t)} - x^{(t-1)})}{n} \\ &- \frac{\|y^{(t+1)} - y^{(t)}\|^2}{1/(4\tau R^2)} - \frac{\|x^{(t+1)} - x^{(t)}\|^2}{8\tau} - \frac{\theta\|x^{(t)} - x^{(t-1)}\|^2}{8\tau}. \end{aligned}$$

Putting everything together, we have

$$\begin{aligned} &\left(\frac{1}{2\tau} - \frac{(1-1/\alpha)\delta\mu^2}{4n}\right) \|x^{(t)} - x^*\|^2 + \left(\frac{1}{2\sigma} + \frac{(n-1)\gamma}{4n}\right) \|y^{(t)} - y^*\|^2 + \theta(\mathcal{L}(x^{(t)}, y^*) - \mathcal{L}(x^*, y^*)) \\ &+ (n-1)(\mathcal{L}(x^*, y^*) - \mathcal{L}(x^*, y^{(t)})) + \theta\left(\frac{1}{8\tau} + \frac{(\alpha-1)\theta\delta L^2}{2n}\right) \|x^{(t)} - x^{(t-1)}\|^2 + \frac{\theta(y^{(t)} - y^*)^T A(x^{(t)} - x^{(t-1)})}{n} \\ &\geq \left(\frac{1}{2\tau} + \frac{\lambda}{2}\right) \mathbb{E}[\|x^{(t+1)} - x^*\|^2] + \left(\frac{1}{2\sigma} + \frac{\gamma}{4}\right) \mathbb{E}[\|y^{(t+1)} - y^*\|^2] + \frac{\mathbb{E}[(y^{(t+1)} - y^*)^T A(x^{(t+1)} - x^{(t)})]}{n} \\ &+ \mathbb{E}[\mathcal{L}(x^{(t+1)}, y^*) - \mathcal{L}(x^*, y^*) + n(\mathcal{L}(x^*, y^*) - \mathcal{L}(x^*, y^{(t+1)}))] \\ &+ \left(\frac{1}{2\tau} - \frac{1}{8\tau}\right) \mathbb{E}[\|x^{(t+1)} - x^{(t)}\|^2] \\ &+ \left(\frac{1}{2\sigma} - 4R^2\tau - \frac{(\alpha-1)\delta}{2\sigma^2}\right) \mathbb{E}[\|y^{(t+1)} - y^{(t)}\|^2]. \end{aligned}$$

If we choose the parameters as

$$\alpha = \frac{\sigma}{4\delta} + 1, \quad \sigma\tau = \frac{1}{16R^2},$$

then we know

$$\frac{1}{2\sigma} - 4R^2\tau - \frac{(\alpha-1)\delta}{2\sigma^2} = \frac{1}{2\sigma} - \frac{1}{4\sigma} - \frac{1}{8\sigma} > 0,$$

and

$$\frac{(\alpha-1)\theta\delta L^2}{2n} \leq \frac{\sigma L^2}{8n^2} \leq \frac{\sigma R^2}{8} \leq \frac{1}{256\tau},$$

thus

$$\frac{1}{8\tau} + \frac{(\alpha-1)\theta\delta L^2}{2n} \leq \frac{3}{8\tau}.$$

In addition, we have

$$1 - \frac{1}{\alpha} = \frac{\sigma}{\sigma + 4\delta}.$$

Finally we obtain

$$\begin{aligned} &\left(\frac{1}{2\tau} - \frac{\sigma\delta\mu^2}{4n(\sigma+4\delta)}\right) \|x^{(t)} - x^*\|^2 + \left(\frac{1}{2\sigma} + \frac{(n-1)\gamma}{4n}\right) \|y^{(t)} - y^*\|^2 + \theta(\mathcal{L}(x^{(t)}, y^*) - \mathcal{L}(x^*, y^*)) \\ &+ (n-1)(\mathcal{L}(x^*, y^*) - \mathcal{L}(x^*, y^{(t)})) + \theta \cdot \frac{3}{8\tau} \|x^{(t)} - x^{(t-1)}\|^2 + \frac{\theta(y^{(t)} - y^*)^T A(x^{(t)} - x^{(t-1)})}{n} \\ &\geq \left(\frac{1}{2\tau} + \frac{\lambda}{2}\right) \mathbb{E}[\|x^{(t+1)} - x^*\|^2] + \left(\frac{1}{2\sigma} + \frac{\gamma}{4}\right) \mathbb{E}[\|y^{(t+1)} - y^*\|^2] + \frac{\mathbb{E}[(y^{(t+1)} - y^*)^T A(x^{(t+1)} - x^{(t)})]}{n} \\ &+ \mathbb{E}[\mathcal{L}(x^{(t+1)}, y^*) - \mathcal{L}(x^*, y^*) + n(\mathcal{L}(x^*, y^*) - \mathcal{L}(x^*, y^{(t+1)}))] + \frac{3}{8\tau} \mathbb{E}[\|x^{(t+1)} - x^{(t)}\|^2]. \end{aligned}$$

Now we can define  $\theta_x$  and  $\theta_y$  as the ratios between the coefficients in the  $x$ -distance and  $y$ -distance terms, and let  $\theta = \max\{\theta_x, \theta_y\}$  as before. Choosing the step-size parameters as

$$\tau = \frac{1}{4R} \sqrt{\frac{\gamma}{n\lambda + \delta\mu^2}}, \quad \sigma = \frac{1}{4R} \sqrt{\frac{n\lambda + \delta\mu^2}{\gamma}}$$

gives the desired result.

## F. Proof of Theorem 4

In this setting, for  $i$ -th coordinate of the dual variables  $y$  we choose  $h = \phi_i^*$ , let

$$\mathcal{D}_i(y_i, y_i') = \phi_i^*(y_i) - \phi_i^*(y_i') + \langle (\phi_i^*)'(y_i'), y_i - y_i' \rangle,$$

and define

$$\mathcal{D}(y, y') = \sum_{i=1}^n \mathcal{D}_i(y_i, y_i').$$

For  $i = 1, \dots, n$ , let  $\tilde{y}_i$  be

$$\tilde{y}_i = \arg \min_y \left\{ \phi_i^*(y) + \frac{\mathcal{D}_i(y, y_i^{(t)})}{\sigma} - y \langle a_i, \tilde{x}^{(t)} \rangle \right\}.$$

Based on the first-order optimality condition, we have

$$\langle a_i, \tilde{x}^{(t)} \rangle - \frac{(\phi_i^*)'(\tilde{y}_i) - (\phi_i^*)'(y_i^{(t)})}{\sigma} \in (\phi_i^*)'(\tilde{y}_i).$$

Also since  $y_i^*$  minimizes  $\phi_i^*(y) - y \langle a_i, x^* \rangle$ , we have

$$\langle a_i, x^* \rangle \in (\phi_i^*)'(y_i^*).$$

Using Lemma 2 with  $\rho = 1/2$ , we obtain

$$\begin{aligned} -y_i^* \langle a_i, \tilde{x}^{(t)} \rangle + \phi_i^*(y_i^*) + \frac{\mathcal{D}_i(y_i^*, y_i^{(t)})}{\sigma} &\geq \left( \frac{1}{\sigma} + \frac{1}{2} \right) \mathcal{D}_i(y_i^*, \tilde{y}_i) + \phi_i^*(\tilde{y}_i) - \tilde{y}_i \langle a_i, \tilde{x}^{(t)} \rangle \\ &\quad + \frac{\mathcal{D}_i(\tilde{y}_i, y_i^{(t)})}{\sigma} + \frac{\delta}{4} ((\phi_i^*)'(\tilde{y}_i) - (\phi_i^*)'(y_i^*))^2, \end{aligned}$$

and rearranging terms, we get

$$\begin{aligned} \frac{\mathcal{D}_i(y_i^*, y_i^{(t)})}{\sigma} &\geq \left( \frac{1}{\sigma} + \frac{1}{2} \right) \mathcal{D}_i(y_i^*, \tilde{y}_i) + \frac{\mathcal{D}_i(\tilde{y}_i, y_i^{(t)})}{\sigma} - (\tilde{y}_i - y_i^*) \langle a_i, \tilde{x}^{(t)} \rangle + (\phi_i^*(\tilde{y}_i) - \phi_i^*(y_i^*)) \\ &\quad + \frac{\delta}{4} ((\phi_i^*)'(\tilde{y}_i) - (\phi_i^*)'(y_i^*))^2. \end{aligned} \tag{41}$$

With i.i.d. random sampling at each iteration, we have the following relations:

$$\begin{aligned} \mathbb{E}[y_i^{(t+1)}] &= \frac{1}{n} \cdot \tilde{y}_i + \frac{n-1}{n} \cdot y_i^{(t)}, \\ \mathbb{E}[\mathcal{D}_i(y_i^{(t+1)}, y_i^*)] &= \frac{\mathcal{D}_i(\tilde{y}_i, y_i^*)}{n} + \frac{(n-1)\mathcal{D}_i(y_i^{(t)}, y_i^*)}{n}, \\ \mathbb{E}[\mathcal{D}_i(y_i^{(t+1)}, y_i^{(t)})] &= \frac{\mathcal{D}_i(\tilde{y}_i, y_i^{(t)})}{n}, \\ \mathbb{E}[\phi_i^*(y_i^{(t+1)})] &= \frac{1}{n} \cdot \phi_i^*(\tilde{y}_i) + \frac{n-1}{n} \cdot \phi_i^*(y_i^{(t)}). \end{aligned}$$

Plugging the above relations into (41) and dividing both sides by  $n$ , we have

$$\begin{aligned} \left( \frac{1}{\sigma} + \frac{(n-1)}{2n} \right) \mathcal{D}_i(y_i^{(t)}, y_i^*) &\geq \left( \frac{1}{\sigma} + \frac{1}{2} \right) \mathcal{D}_i(y_i^{(t+1)}, y_i^*) + \frac{1}{\sigma} \mathbb{E}[\mathcal{D}_i(y_i^{(t+1)}, y_i^{(t)})] \\ &\quad - \left( \mathbb{E}[y_i^{(t+1)}] - y_i^{(t)} \right) \langle a_i, \tilde{x}^{(t)} \rangle \\ &\quad + \mathbb{E}[\phi_i^*(y_i^{(t+1)})] - \phi_i^*(y_i^{(t)}) + \frac{1}{n} (\phi_i^*(y_i^{(t)}) - \phi_i^*(y_i^*)) \\ &\quad + \frac{\delta}{4n} \left( \langle a_i, \tilde{x}^{(t)} - x^* \rangle - \frac{((\phi_i^*)'(\tilde{y}_i) - (\phi_i^*)'(y_i^{(t)}))}{\sigma} \right)^2, \end{aligned}$$

and summing over  $i = 1, \dots, n$ , we get

$$\begin{aligned} \left(\frac{1}{\sigma} + \frac{(n-1)}{2n}\right) \mathcal{D}(y^{(t)}, y^*) &\geq \left(\frac{1}{\sigma} + \frac{1}{2}\right) \mathbb{E}[\mathcal{D}(y^{(t+1)}, y^*)] + \frac{\mathbb{E}[\mathcal{D}(y^{(t+1)}, y^{(t)})]}{\sigma} \\ &\quad + \phi_k^*(y_k^{(t+1)}) - \phi_k^*(y_k^{(t)}) + \frac{1}{n} \sum_{i=1}^n (\phi_i^*(y_i^{(t)}) - \phi_i^*(y_i^*)) \\ &\quad - \left\langle n(u^{(t+1)} - u^{(t)}) + (u^{(t)} - u^*), \tilde{x}^{(t)} \right\rangle \\ &\quad + \frac{\delta}{4n} \left\| A(x^* - \tilde{x}^{(t)}) + \frac{(\phi^{*'}(\tilde{y}) - \phi^{*'}(y^{(t)}))}{\sigma} \right\|^2, \end{aligned}$$

where  $\phi^{*'}(y^{(t)})$  is a  $n$ -dimensional vector such that the  $i$ -th coordinate is

$$[\phi^{*'}(y^{(t)})]_i = (\phi_i^*)'(y_i^{(t)}),$$

and

$$u^{(t)} = \frac{1}{n} \sum_{i=1}^n y_i^{(t)} a_i, \quad u^{(t+1)} = \frac{1}{n} \sum_{i=1}^n y_i^{(t+1)} a_i, \quad \text{and} \quad u^* = \frac{1}{n} \sum_{i=1}^n y_i^* a_i.$$

On the other hand, since  $x^{(t+1)}$  minimizes a  $\frac{1}{\tau} + \lambda$ -strongly convex objective

$$g(x) + \left\langle u^{(t)} + n(u^{(t+1)} - u^{(t)}), x \right\rangle + \frac{\|x - x^{(t)}\|^2}{2\tau},$$

we can apply Lemma 2 with  $\rho = 0$  to obtain

$$\begin{aligned} g(x^*) + \left\langle u^{(t)} + n(u^{(t+1)} - u^{(t)}), x^* \right\rangle + \frac{\|x^{(t)} - x^*\|^2}{2\tau} \\ \geq g(x^{(t+1)}) + \left\langle u^{(t)} + n(u^{(t+1)} - u^{(t)}), x^{(t+1)} \right\rangle + \frac{\|x^{(t+1)} - x^{(t)}\|^2}{2\tau} + \left(\frac{1}{2\tau} + \frac{\lambda}{2}\right) \|x^{(t+1)} - x^*\|^2, \end{aligned}$$

and rearranging terms, we get

$$\begin{aligned} \frac{\|x^{(t)} - x^*\|^2}{2\tau} &\geq \left(\frac{1}{2\tau} + \frac{\lambda}{2}\right) \mathbb{E}[\|x^{(t+1)} - x^*\|^2] + \frac{\mathbb{E}[\|x^{(t+1)} - x^{(t)}\|^2]}{2\tau} + \mathbb{E}[g(x^{(t+1)}) - g(x^*)] \\ &\quad + \mathbb{E}[\left\langle u^{(t)} + n(u^{(t+1)} - u^{(t)}), x^{(t+1)} - x^* \right\rangle]. \end{aligned}$$

Notice that

$$\begin{aligned} \mathcal{L}(x^{(t+1)}, y^*) - \mathcal{L}(x^*, y^*) + n(\mathcal{L}(x^*, y^*) - \mathcal{L}(x^*, y^{(t+1)})) - (n-1)(\mathcal{L}(x^*, y^*) - \mathcal{L}(x^*, y^{(t)})) \\ = \frac{1}{n} \sum_{i=1}^n (\phi_i^*(y_i^{(t)}) - \phi_i^*(y_i^*)) + (\phi_k^*(y_k^{(t+1)}) - \phi_k^*(y_k^{(t)})) + g(x^{(t+1)}) - g(x^*) \\ + \left\langle u^*, x^{(t+1)} \right\rangle - \left\langle u^{(t)}, x^* \right\rangle + n\left\langle u^{(t)} - u^{(t+1)}, x^* \right\rangle, \end{aligned}$$

so

$$\begin{aligned} \frac{\|x^{(t)} - x^*\|^2}{2\tau} + \left(\frac{1}{\sigma} + \frac{(n-1)}{2n}\right) \mathcal{D}(y^{(t)}, y^*) + (n-1)(\mathcal{L}(x^*, y^*) - \mathcal{L}(x^*, y^{(t)})) \\ \geq \left(\frac{1}{2\tau} + \frac{\lambda}{2}\right) \mathbb{E}[\|x^{(t+1)} - x^*\|^2] + \left(\frac{1}{\sigma} + \frac{1}{2}\right) \mathbb{E}[\mathcal{D}(y^{(t+1)}, y^*)] + \frac{\mathbb{E}[\|x^{(t+1)} - x^{(t)}\|^2]}{2\tau} + \frac{\mathbb{E}[\mathcal{D}(y^{(t+1)}, y^{(t)})]}{\sigma} \\ + \mathbb{E}[\mathcal{L}(x^{(t+1)}, y^*) - \mathcal{L}(x^*, y^*) + n(\mathcal{L}(x^*, y^*) - \mathcal{L}(x^*, y^{(t+1)}))] \\ + \mathbb{E}[\left\langle u^{(t)} - u^* + n(u^{(t+1)} - u^{(t)}), x^{(t+1)} - \tilde{x}^{(t)} \right\rangle] + \frac{\delta}{4n} \left\| A(x^* - \tilde{x}^{(t)}) + \frac{(\phi^{*'}(\tilde{y}) - \phi^{*'}(y^{(t)}))}{\sigma} \right\|^2. \end{aligned}$$

Next, we have

$$\begin{aligned} \frac{\delta}{4n} \left\| A(x^* - \tilde{x}^{(t)}) + \frac{(\phi^{*'}(\tilde{y}) - \phi^{*'}(y^{(t)}))}{\sigma} \right\|^2 &= \frac{\delta}{4n} \left\| A(x^* - x^{(t)}) - \theta A(x^{(t)} - x^{(t-1)}) + \frac{(\phi^{*'}(\tilde{y}) - \phi^{*'}(y^{(t)}))}{\sigma} \right\|^2 \\ &\geq \left(1 - \frac{1}{\alpha}\right) \frac{\delta}{4n} \left\| A(x^* - x^{(t)}) \right\|^2 \\ &\quad - (\alpha - 1) \frac{\delta}{4n} \left\| \theta A(x^{(t)} - x^{(t-1)}) + \frac{(\phi^{*'}(\tilde{y}) - \phi^{*'}(y^{(t)}))}{\sigma} \right\|^2, \end{aligned}$$

for any  $\alpha > 1$  and

$$\left\| A(x^* - x^{(t)}) \right\|^2 \geq \mu^2 \|x^* - x^{(t)}\|^2,$$

and

$$\begin{aligned} \left\| \theta A(x^{(t)} - x^{(t-1)}) + \frac{(\phi^{*'}(\tilde{y}) - \phi^{*'}(y^{(t)}))}{\sigma} \right\|^2 &\geq -2\theta^2 \|A(x^{(t)} - x^{(t-1)})\|^2 - \frac{2}{\sigma^2} \|\phi^{*'}(\tilde{y}) - \phi^{*'}(y^{(t)})\|^2 \\ &\geq -2\theta^2 L^2 \|x^{(t)} - x^{(t-1)}\|^2 - \frac{2n}{\sigma^2} \mathbb{E}[\|\phi^{*'}(y^{(t+1)}) - \phi^{*'}(y^{(t)})\|^2]. \end{aligned}$$

Following the same reasoning as in the standard SPDC analysis, we have

$$\begin{aligned} \langle u^{(t)} - u^* + n(u^{(t+1)} - u^{(t)}), x^{(t+1)} - \tilde{x}^{(t)} \rangle &= \frac{(y^{(t+1)} - y^*)^T A(x^{(t+1)} - x^{(t)})}{n} - \frac{\theta(y^{(t)} - y^*)^T A(x^{(t)} - x^{(t-1)})}{n} \\ &\quad + \frac{(n-1)}{n} (y^{(t+1)} - y^{(t)})^T A(x^{(t+1)} - x^{(t)}) - \theta(y^{(t+1)} - y^{(t)})^T A(x^{(t)} - x^{(t-1)}), \end{aligned}$$

and using Cauchy-Schwartz inequality, we have

$$\begin{aligned} |(y^{(t+1)} - y^{(t)})^T A(x^{(t)} - x^{(t-1)})| &\leq \frac{\|(y^{(t+1)} - y^{(t)})^T A\|^2}{1/(2\tau)} + \frac{\|x^{(t)} - x^{(t-1)}\|^2}{8\tau} \\ &\leq \frac{\|y^{(t+1)} - y^{(t)}\|^2}{1/(2\tau R^2)}, \end{aligned}$$

and

$$\begin{aligned} |(y^{(t+1)} - y^{(t)})^T A(x^{(t+1)} - x^{(t)})| &\leq \frac{\|(y^{(t+1)} - y^{(t)})^T A\|^2}{1/(2\tau)} + \frac{\|x^{(t+1)} - x^{(t)}\|^2}{8\tau} \\ &\leq \frac{\|y^{(t+1)} - y^{(t)}\|^2}{1/(2\tau R^2)}. \end{aligned}$$

Thus we get

$$\begin{aligned} \langle u^{(t)} - u^* + n(u^{(t+1)} - u^{(t)}), x^{(t+1)} - \tilde{x}^{(t)} \rangle &\geq \frac{(y^{(t+1)} - y^*)^T A(x^{(t+1)} - x^{(t)})}{n} - \frac{\theta(y^{(t)} - y^*)^T A(x^{(t)} - x^{(t-1)})}{n} \\ &\quad - \frac{\|y^{(t+1)} - y^{(t)}\|^2}{1/(4\tau R^2)} - \frac{\|x^{(t+1)} - x^{(t)}\|^2}{8\tau} - \frac{\theta \|x^{(t)} - x^{(t-1)}\|^2}{8\tau}. \end{aligned}$$

Also we can lower bound the term  $\mathcal{D}(y^{(t+1)}, y^{(t)})$  using Lemma 2 with  $\rho = 1/2$ :

$$\begin{aligned} \mathcal{D}(y^{(t+1)}, y^{(t)}) &= \sum_{i=1}^n \left( \phi_i^*(y_i^{(t+1)}) - \phi_i^*(y_i^{(t)}) - \langle (\phi_i^*)'(y_i^{(t)}), y_i^{(t+1)} - y_i^{(t)} \rangle \right) \\ &\geq \sum_{i=1}^n \left( \frac{\gamma}{2} (y_i^{(t+1)} - y_i^{(t)})^2 + \frac{\delta}{2} ((\phi_i^*)'(y_i^{(t+1)}) - (\phi_i^*)'(y_i^{(t)}))^2 \right) \\ &= \frac{\gamma}{2} \|y^{(t+1)} - y^{(t)}\|^2 + \frac{\delta}{2} \|\phi^{*'}(y^{(t+1)}) - \phi^{*'}(y^{(t)})\|^2. \end{aligned}$$

Combining everything above together, we have

$$\begin{aligned}
 & \left( \frac{1}{2\tau} - \frac{(1-1/\alpha)\delta\mu^2}{4n} \right) \|x^{(t)} - x^*\|^2 + \left( \frac{1}{\sigma} + \frac{(n-1)}{2n} \right) \mathcal{D}(y^{(t)}, y^*) + \theta(\mathcal{L}(x^{(t)}, y^*) - \mathcal{L}(x^*, y^*)) \\
 & + (n-1)(\mathcal{L}(x^*, y^*) - \mathcal{L}(x^*, y^{(t)})) + \theta \left( \frac{1}{8\tau} + \frac{(\alpha-1)\theta\delta L^2}{2n} \right) \|x^{(t)} - x^{(t-1)}\|^2 + \frac{\theta(y^{(t)} - y^*)^T A(x^{(t)} - x^{(t-1)})}{n} \\
 & \geq \left( \frac{1}{2\tau} + \frac{\lambda}{2} \right) \mathbb{E}[\|x^{(t+1)} - x^*\|^2] + \left( \frac{1}{\sigma} + \frac{1}{2} \right) \mathbb{E}[\mathcal{D}(y^{(t+1)}, y^*)] + \frac{\mathbb{E}[(y^{(t+1)} - y^*)^T A(x^{(t+1)} - x^{(t)})]}{n} \\
 & + \mathbb{E}[\mathcal{L}(x^{(t+1)}, y^*) - \mathcal{L}(x^*, y^*) + n(\mathcal{L}(x^*, y^*) - \mathcal{L}(x^*, y^{(t+1)}))] \\
 & + \left( \frac{1}{2\tau} - \frac{1}{8\tau} \right) \mathbb{E}[\|x^{(t+1)} - x^{(t)}\|^2] + \left( \frac{\gamma}{2\sigma} - 4R^2\tau \right) \mathbb{E}[\|y^{(t+1)} - y^{(t)}\|^2] \\
 & + \left( \frac{\delta}{2\sigma} - \frac{(\alpha-1)\delta}{2\sigma^2} \right) \mathbb{E}[\|\phi^{*'}(y^{(t+1)}) - \phi^{*'}(y^{(t)})\|^2].
 \end{aligned}$$

If we choose the parameters as

$$\alpha = \frac{\sigma}{4} + 1, \quad \sigma\tau = \frac{\gamma}{16R^2},$$

then we know

$$\frac{\gamma}{2\sigma} - 4R^2\tau = \frac{\gamma}{2\sigma} - \frac{\gamma}{4\sigma} > 0,$$

and

$$\frac{\delta}{2\sigma} - \frac{(\alpha-1)\delta}{2\sigma^2} = \frac{\delta}{2\sigma} - \frac{\delta}{8\sigma} > 0$$

and

$$\frac{(\alpha-1)\theta\delta L^2}{2n} \leq \frac{\sigma\delta L^2}{8n^2} \leq \frac{\delta\sigma R^2}{8} \leq \frac{\delta\gamma}{256\tau} \leq \frac{1}{256\tau},$$

thus

$$\frac{1}{8\tau} + \frac{(\alpha-1)\theta\delta L^2}{2n} \leq \frac{3}{8\tau}.$$

In addition, we have

$$1 - \frac{1}{\alpha} = \frac{\sigma}{\sigma + 4}.$$

Finally we obtain

$$\begin{aligned}
 & \left( \frac{1}{2\tau} - \frac{\sigma\delta\mu^2}{4n(\sigma+4)} \right) \|x^{(t)} - x^*\|^2 + \left( \frac{1}{\sigma} + \frac{(n-1)}{2n} \right) \mathcal{D}(y^{(t)}, y^*) + \theta(\mathcal{L}(x^{(t)}, y^*) - \mathcal{L}(x^*, y^*)) \\
 & + (n-1)(\mathcal{L}(x^*, y^*) - \mathcal{L}(x^*, y^{(t)})) + \theta \cdot \frac{3}{8\tau} \|x^{(t)} - x^{(t-1)}\|^2 + \frac{\theta(y^{(t)} - y^*)^T A(x^{(t)} - x^{(t-1)})}{n} \\
 & \geq \left( \frac{1}{2\tau} + \frac{\lambda}{2} \right) \mathbb{E}[\|x^{(t+1)} - x^*\|^2] + \left( \frac{1}{\sigma} + \frac{1}{2} \right) \mathbb{E}[\|y^{(t+1)} - y^*\|^2] + \frac{\mathbb{E}[(y^{(t+1)} - y^*)^T A(x^{(t+1)} - x^{(t)})]}{n} \\
 & + \mathbb{E}[\mathcal{L}(x^{(t+1)}, y^*) - \mathcal{L}(x^*, y^*) + n(\mathcal{L}(x^*, y^*) - \mathcal{L}(x^*, y^{(t+1)}))] + \frac{3}{8\tau} \mathbb{E}[\|x^{(t+1)} - x^{(t)}\|^2].
 \end{aligned}$$

As before, we can define  $\theta_x$  and  $\theta_y$  as the ratios between the coefficients in the  $x$ -distance and  $y$ -distance terms, and let  $\theta = \max\{\theta_x, \theta_y\}$ . Then choosing the step-size parameters as

$$\tau = \frac{1}{4R} \sqrt{\frac{\gamma}{n\lambda + \delta\mu^2}}, \quad \sigma = \frac{1}{4R} \sqrt{\gamma(n\lambda + \delta\mu^2)}$$

gives the desired result.
